# Supplementary material
Source: MDPI journal article supplement (https://www.mdpi.com/1424-8247/16/5/711)
Supplement: s1 [file s1]

# The Effect of Statins on Ocular Disorders: A Systematic Review of Randomized Controlled Trials

## Supplementary material

| Supplementary Table S1. PICOS criteria for inclusion and exclusion of studies |                                                                                                             |                                                                     |
|-------------------------------------------------------------------------------|-------------------------------------------------------------------------------------------------------------|---------------------------------------------------------------------|
| Parameter                                                                     | Inclusion                                                                                                   | Exclusion                                                           |
| Population                                                                    | Adult population (>18) receiving statins                                                                    | Patients not receiving statins, age <18                             |
| Intervention                                                                  | Administration of statins, alone or in conjunction with background treatment                                | Other interventions                                                 |
| Comparator                                                                    | Placebo, diet or control group                                                                              | Statins, Other than placebo/control group                           |
| Outcomes                                                                      | Effect on ocular disorders (Cataract, AMD, glaucoma, diabetic retinopathy, dry eye, uveitis, macular edema) | Other outcomes, or lack of data regarding specific ocular disorders |
| Study design                                                                  | Randomized controlled trials, published in English                                                          | All other study types, Published in any other language than English |

| Supplementary Table S2. Excluded studies with reasons |      |                             |
|-------------------------------------------------------|------|-----------------------------|
| Study                                                 | Year | Reason of exclusion         |
| Murakami [1]                                          | 2020 | Different comparator        |
| Maguire [2]                                           | 2009 | Not an RCT                  |
| Al-Holou [3]                                          | 2015 | Not an RCT                  |
| Chew [4]                                              | 2014 | Different comparator        |
| Martini*                                              | 1991 | Language other than English |
| Gaede [5]                                             | 2008 | Different comparator        |
| Tobert [6]                                            | 1990 | Not an RCT                  |

\*This study was retrieved after the screening of another systematic review [7]

## References

1. Murakami, T.; Kato, S.; Shigeeda, T.; Itoh, H.; Komuro, I.; Takeuchi, M.; Yoshimura, N.; ophthalmology substudy of, E.I. Intensive treat-to-target statin therapy and severity of diabetic retinopathy complicated by hypercholesterolaemia. *Eye (Lond)* **2021**, *35*, 2221-2228, doi:10.1038/s41433-020-01202-5.
2. Maguire, M.G.; Ying, G.S.; McCannel, C.A.; Liu, C.; Dai, Y.; Complications of Age-related Macular Degeneration Prevention Trial Research, G. Statin use and the incidence of advanced age-related macular degeneration in the Complications of Age-related Macular Degeneration Prevention Trial. *Ophthalmology* **2009**, *116*, 2381-2385, doi:10.1016/j.ophtha.2009.06.055.
3. Al-Holou, S.N.; Tucker, W.R.; Agron, E.; Clemons, T.E.; Cukras, C.; Ferris, F.L., 3rd; Chew, E.Y.; Age-Related Eye Disease Study 2 Research, G. The Association of Statin Use with Age-Related Macular Degeneration Progression: The Age-Related Eye Disease Study 2 Report Number 9. *Ophthalmology* **2015**, *122*, 2490-2496, doi:10.1016/j.ophtha.2015.08.028.
4. Chew, E.Y.; Davis, M.D.; Danis, R.P.; Lovato, J.F.; Perdue, L.H.; Greven, C.; Genuth, S.; Goff, D.C.; Leiter, L.A.; Ismail-Beigi, F.; et al. The effects of medical management on the progression of diabetic retinopathy in persons with type 2 diabetes: the Action to Control Cardiovascular Risk in Diabetes (ACCORD) Eye Study. *Ophthalmology* **2014**, *121*, 2443-2451, doi:10.1016/j.ophtha.2014.07.019.
5. Gaede, P.; Lund-Andersen, H.; Parving, H.H.; Pedersen, O. Effect of a multifactorial intervention on mortality in type 2 diabetes. *N Engl J Med* **2008**, *358*, 580-591, doi:10.1056/NEJMoa0706245.
6. Tobert, J.A.; Shear, C.L.; Chremos, A.N.; Mantell, G.E. Clinical experience with lovastatin. *Am J Cardiol* **1990**, *65*, 23F-26F, doi:10.1016/0002-9149(90)91251-z.
7. Gehlbach, P.; Li, T.; Hafez, E. Statins for age-related macular degeneration. *Cochrane Database Syst Rev* **2016**, 2016, Cd006927, doi:10.1002/14651858.CD006927.pub5.
